# Supplementary material for: Logic Learning Machine creates explicit and stable rules stratifying neuroblastoma patients
Source: PubMed Central journal article supplement (PMC3633028; doi:10.1186/1471-2105-14-s7-s12), 2013-04-22

## Additional file 1

**Fig. 1 - Number of clusters selection.**

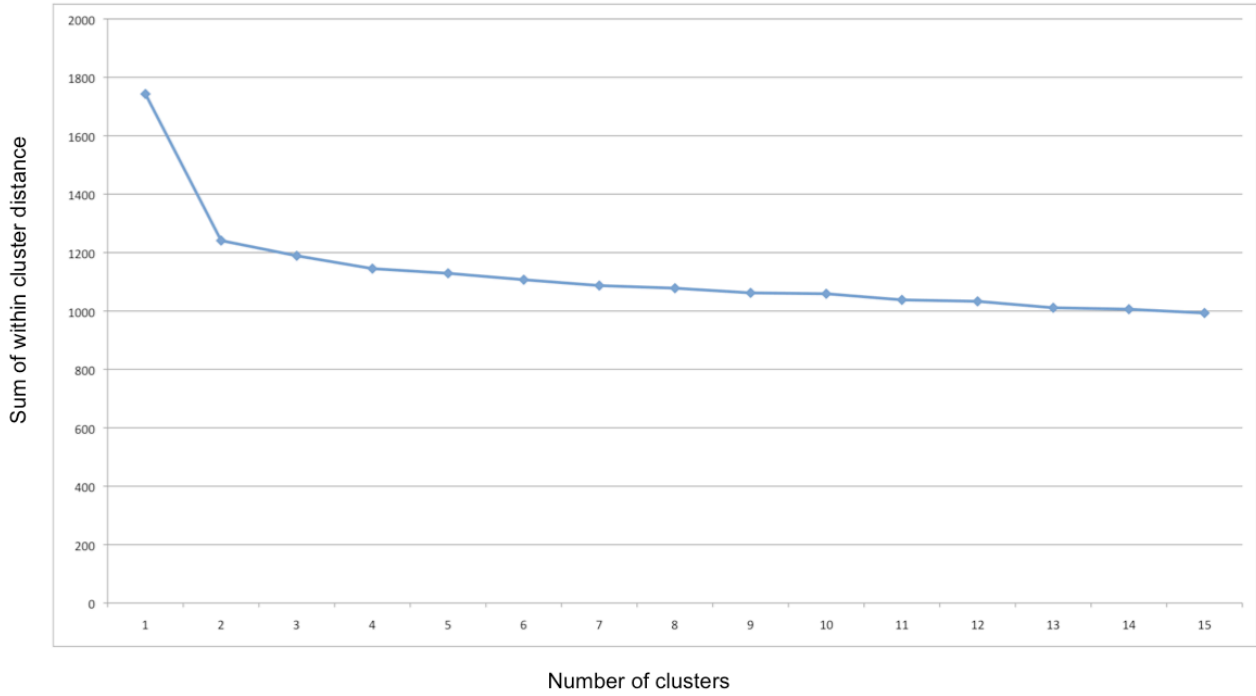

Supplement: 1471-2105-14-S7-S12-S1.pdf [file 1471-2105-14-S7-S12-S1.pdf]
