# Supplementary material for: Logic Learning Machine creates explicit and stable rules stratifying neuroblastoma patients
Source: PubMed Central journal article supplement (PMC3633028; doi:10.1186/1471-2105-14-s7-s12), 2013-04-22
Supplement: 1471-2105-14-S7-S12-S2.pdf [file 1471-2105-14-S7-S12-S2.pdf]

Additional file 2

Table 1 – Core rules from the first iteration of the stabilization procedure.

| Rule ID <sup>a</sup> | NB-hypo     | INSS Stage    | MYCN Status | Age at diagnosis (Years) | Predicted Outcome | Stability <sup>b</sup> |
|----------------------|-------------|---------------|-------------|--------------------------|-------------------|------------------------|
| A1.1                 | IF ( – )    | –             | –           | < 1                      | THEN Good         | 0.94                   |
| A1.2                 | IF ( High ) | {2, 3, 4}     | normal      | ≥ 1                      | THEN Poor         | 0.8                    |
| A1.3                 | IF ( High ) | {3, 4}        | –           | ≥ 1                      | THEN Poor         | 1                      |
| A1.4                 | IF ( Low )  | {1, 2, 3, 4s} | normal      | –                        | THEN Good         | 1                      |
| A1.5                 | IF ( – )    | {1, 2, 4s}    | amplified   | –                        | THEN Good         | 0.8                    |
| A1.6                 | IF ( – )    | {1, 4s}       | normal      | –                        | THEN Good         | 1                      |
| A1.7                 | IF ( – )    | {4}           | amplified   | ≥ 1                      | THEN Poor         | 1                      |

<sup>a</sup> The Rule ID is composed by the A (additional file), followed by the table number, a dot and the rule number.

<sup>b</sup> Stability is the fraction of the occurrences of a given rule in a 5 rounds of 10 fold cross validations.

**Table 2 – Classification rules of the second iteration on a purged 155 patients' dataset**

| Rule ID <sup>a</sup> | NB-hypo   | INSS Stage | MYCN Status | Age at diagnosis (Years) | Predicted Outcome | Covering <sup>b</sup> (%) | Error <sup>c</sup> (%) | Fisher pvalue <sup>d</sup> | Stability <sup>e</sup> |      |
|----------------------|-----------|------------|-------------|--------------------------|-------------------|---------------------------|------------------------|----------------------------|------------------------|------|
| <b>A2.1</b>          | IF ( _    | {4}        | _           | ≥ 1                      | )THEN             | Poor                      | 89                     | 4                          | <0.001                 | 1    |
| <b>A2.2</b>          | IF ( High | {2, 3, 4}  | _           | ≥ 1                      | )THEN             | Poor                      | 86                     | 3                          | <0.001                 | 1    |
| <b>A2.3</b>          | IF ( Low  | _          | normal      | _                        | )THEN             | Good                      | 89                     | 0                          | <0.001                 | 1    |
| <b>A2.4</b>          | IF ( _    | {1, 2, 4s} | _           | _                        | )THEN             | Good                      | 74                     | 0                          | <0.001                 | 0.9  |
| <b>A2.5</b>          | IF ( _    | _          | _           | < 1                      | )THEN             | Good                      | 72                     | 0                          | <0.001                 | 0.88 |

<sup>a</sup> The Rule ID is composed by the A that indicate a rule in an additional file, followed by the table number, a dot and the rule number.

<sup>b</sup> Covering is the fraction of examples in the training set that verify the rule and belong to the target class.

<sup>c</sup> Error is the fraction of examples in the training set that satisfy the rule and do not belong to the target class.

<sup>d</sup> Fisher p-value quantifies the statistical significance of the rule.

<sup>e</sup> Stability measures the fraction of the occurrences of a given rule in a 5 rounds of 10 fold cross validations.

**Table 3 – Core rules from the second iteration of the stabilization procedure.**

| <b>Rule ID<sup>a</sup></b> | <b>NB-hypo</b>   | <b>INSS Stage</b> | <b>MYCN Status</b> | <b>Age at diagnosis (Years)</b> | <b>Predicted Outcome</b> | <b>Stability<sup>b</sup></b> |      |
|----------------------------|------------------|-------------------|--------------------|---------------------------------|--------------------------|------------------------------|------|
| <b>A3.5</b>                | <i>IF</i> ( _    | {4}               | _                  | ≥ 1                             | ) <i>THEN</i>            | Poor                         | 1    |
| <b>A3.2</b>                | <i>IF</i> ( High | {2, 3, 4}         | _                  | ≥ 1                             | ) <i>THEN</i>            | Poor                         | 1    |
| <b>A3.3</b>                | <i>IF</i> ( Low  | _                 | normal             | _                               | ) <i>THEN</i>            | Good                         | 1    |
| <b>A3.4</b>                | <i>IF</i> ( _    | {1, 2, 4s}        | normal             | _                               | ) <i>THEN</i>            | Good                         | 1    |
| <b>A3.1</b>                | <i>IF</i> ( _    | _                 | _                  | < 1                             | ) <i>THEN</i>            | Good                         | 0.78 |

<sup>a</sup> The Rule ID is composed by the A (additional file), followed by the table number, a dot and the rule number.

<sup>b</sup> Stability is the fraction of the occurrences of a given rule in a 5 rounds of 10 fold cross validations.
